# Supplementary material for: Precise dating of deglacial Laptev Sea sediments via 14 C and authigenic 10 Be/ 9 Be – assessing local 14 C reservoir ages
Source: Copernicus journal article supplement (doi:10.5194/egusphere-2024-1992), 2024-07-04
Supplement: Supplementary file 1 [file egusphere-2024-1992-supplement.pdf]

Supplement of

## Precise dating of deglacial Laptev Sea sediments via $^{14}\text{C}$ and authigenic $^{10}\text{Be}/^9\text{Be}$ – assessing local $^{14}\text{C}$ reservoir ages

Arnaud Nicolas, Gesine Mollenhauer, Johannes Lachner, Konstanze Stübner, Maylin Malter, Jutta Wollenburg, Hendrik Grotheer, Florian Adolphi

### 1. Comparison of age-depth models for core PS2458-4

**Table S1. Radiocarbon and modelled ages from foraminifera and bivalve samples from core PS2458-4**

| Depth (cm) | $^{14}\text{C}$ Age ( $^{14}\text{C}$ years) | $\pm$ (years) | $(\Delta R = 345 \pm 60 \text{ }^{14}\text{C} \text{ years BP})$ |                                   | $(\Delta R = -110 \pm 28 \text{ }^{14}\text{C} \text{ years BP})$ |                                   | Modelled Age (difference) (cal BP) | Sample type                    |
|------------|----------------------------------------------|---------------|------------------------------------------------------------------|-----------------------------------|-------------------------------------------------------------------|-----------------------------------|------------------------------------|--------------------------------|
|            |                                              |               | Modelled Age (mean) (cal BP)                                     | Modelled Age (cal BP, $2\sigma$ ) | Modelled Age (mean) (cal BP)                                      | Modelled Age (cal BP, $2\sigma$ ) |                                    |                                |
| 667        | 12600                                        | 110           | 13745                                                            | 14089 – 13360                     | 14452                                                             | 14870 – 14009                     | 707                                | mixed bivalves, benthic forams |
| 578        | 12270                                        | 65            | 13198                                                            | 13428 – 12982                     | 13687                                                             | 13931 – 13470                     | 489                                | mixed benthic forams           |
| 530        | 11560                                        | 100           | 12551                                                            | 12815 – 12244                     | 12980                                                             | 13199 – 12748                     | 429                                | mixed benthic forams           |
| 491*       | 10968                                        | 159           | 11753                                                            | 12220 – 11280                     | 12371                                                             | 12692 – 12026                     | 618                                | mixed benthic forams           |
| 467        | 10600                                        | 75            | 11291                                                            | 11630 – 11005                     | 11973                                                             | 12279 – 11683                     | 682                                | mixed benthic forams           |
| 399        | 10090                                        | 65            | 10551                                                            | 10811 – 10276                     | 11185                                                             | 11397 – 10991                     | 634                                | mixed benthic forams           |
| 369        | 10020                                        | 70            | 10357                                                            | 10606 – 10135                     | 10966                                                             | 11187 – 10746                     | 609                                | mixed benthic forams           |
| 331.5*     | 9596                                         | 122           | 9860                                                             | 10183 – 9527                      | 10456                                                             | 10757 – 10172                     | 596                                | mixed benthic forams           |
| 291.5*     | 9089                                         | 224           | 9305                                                             | 9711 – 8917                       | 9890                                                              | 10230 – 9529                      | 585                                | mixed benthic forams           |
| 252        | 8830                                         | 55            | 8880                                                             | 9129 – 8615                       | 9432                                                              | 9594 – 9258                       | 552                                | mixed benthic forams           |
| 241.5*     | 8762                                         | 141           | 8762                                                             | 9058 – 8448                       | 9310                                                              | 9527 – 9044                       | 548                                | mixed benthic forams           |
| 141.5*     | 6447                                         | 158           | 6334                                                             | 6696 – 5969                       | 6838                                                              | 7177 – 6489                       | 504                                | mixed benthic forams           |
| 121.5*     | 6029                                         | 134           | 5985                                                             | 6297 – 5638                       | 6463                                                              | 6790 – 6143                       | 478                                | mixed benthic forams           |
| 0.5*       | 0                                            |               | 0                                                                |                                   |                                                                   |                                   |                                    | mixed benthic forams           |

Modelled ages were calculated using OxCal4.4 (Ramsey, 2009) with corresponding  $\Delta R$  values. Marine  $^{14}\text{C}$  dates were calibrated with the Marine20 curve (Heaton et al., 2020). The depth values with asterisks represent the new benthic foraminifera samples measured for  $^{14}\text{C}$  dates. The depth values without asterisks show the  $^{14}\text{C}$  dates published from (Spielhagen et al., 2005). The modelled age (difference) is calculated by subtracting the modelled age (mean) with  $\Delta R = -110 \pm 28 \text{ }^{14}\text{C} \text{ years BP}$  from the modelled age (mean) with  $\Delta R = 345 \pm 60 \text{ }^{14}\text{C} \text{ years BP}$ .

## 2. Concentrations of <sup>9</sup>Be, <sup>10</sup>Be and <sup>10</sup>Be/<sup>9</sup>Be atomic ratios from core PS2458-4

Table S2. Mass of <sup>9</sup>Be-carrier and concentrations of <sup>9</sup>Be, <sup>10</sup>Be and <sup>10</sup>Be/<sup>9</sup>Be from core PS2458-4

| Depth<br>(cm) | Sample<br>Mass<br>(g) | <sup>9</sup> Be-<br>Carrier<br>(μg) | Authigenic<br><sup>9</sup> Be<br>(at/g)<br>[x10 <sup>16</sup> ] | sigma<br>(%) | Be <sup>10</sup> /Be <sup>9</sup><br>(at/at)<br>[x10 <sup>-12</sup> ] | sigma<br>(%) | Authigenic<br><sup>10</sup> Be<br>(at/g)<br>[x10 <sup>8</sup> ] | sigma<br>(%) | Authigenic<br><sup>10</sup> Be/ <sup>9</sup> Be<br>(at/at)<br>[x10 <sup>-8</sup> ] | sigma<br>(%) |
|---------------|-----------------------|-------------------------------------|-----------------------------------------------------------------|--------------|-----------------------------------------------------------------------|--------------|-----------------------------------------------------------------|--------------|------------------------------------------------------------------------------------|--------------|
| 30            | 1.00                  | 505                                 | 1.10                                                            | 5.0          | 2.84                                                                  | 2.0          | 1.95                                                            | 2.0          | 1.77                                                                               | 5.4          |
| 70            | 1.01                  | 504                                 | 1.06                                                            | 5.0          | 2.63                                                                  | 1.9          | 1.76                                                            | 1.9          | 1.67                                                                               | 5.3          |
| 190           | 1.00                  | 206                                 | 2.07                                                            | 5.5          | 9.81                                                                  | 2.1          | 2.06                                                            | 2.1          | 0.99                                                                               | 5.9          |
| 198           | 1.00                  | 504                                 | 1.14                                                            | 5.0          | 1.66                                                                  | 2.4          | 1.13                                                            | 2.4          | 1.00                                                                               | 5.5          |
| 200           | 1.00                  | 204                                 | 1.42                                                            | 5.0          | 7.19                                                                  | 2.0          | 1.50                                                            | 2.0          | 1.06                                                                               | 5.4          |
| 210           | 1.00                  | 504                                 | 1.12                                                            | 5.0          | 1.73                                                                  | 1.9          | 1.17                                                            | 1.9          | 1.04                                                                               | 5.4          |
| 220           | 1.00                  | 205                                 | 1.34                                                            | 5.0          | 6.27                                                                  | 2.0          | 1.32                                                            | 2.0          | 0.99                                                                               | 5.4          |
| 230           | 1.00                  | 208                                 | 1.87                                                            | 5.0          | 8.30                                                                  | 2.1          | 1.77                                                            | 2.1          | 0.94                                                                               | 5.4          |
| 240           | 1.00                  | 304                                 | 1.23                                                            | 5.0          | 3.98                                                                  | 2.1          | 1.24                                                            | 2.1          | 1.01                                                                               | 5.4          |
| 250           | 1.00                  | 306                                 | 1.43                                                            | 5.2          | 4.31                                                                  | 2.0          | 1.36                                                            | 2.0          | 0.95                                                                               | 5.6          |
| 260           | 1.00                  | 306                                 | 1.19                                                            | 7.6          | 4.10                                                                  | 2.0          | 1.28                                                            | 2.0          | 1.08                                                                               | 7.9          |
| 260           | 1.00                  | 505                                 | 0.98                                                            | 6.0          | 1.50                                                                  | 2.1          | 1.02                                                            | 2.1          | 1.04                                                                               | 6.3          |
| 270           | 1.00                  | 307                                 | 1.26                                                            | 6.6          | 3.98                                                                  | 2.0          | 1.25                                                            | 2.0          | 0.99                                                                               | 6.9          |
| 280           | 1.00                  | 306                                 | 1.30                                                            | 5.0          | 3.85                                                                  | 2.0          | 1.23                                                            | 2.0          | 0.95                                                                               | 5.4          |
| 287           | 1.00                  | 306                                 | 1.32                                                            | 5.0          | 4.11                                                                  | 2.0          | 1.27                                                            | 2.0          | 0.96                                                                               | 5.4          |
| 290           | 1.00                  | 307                                 | 1.41                                                            | 5.0          | 4.16                                                                  | 2.0          | 1.30                                                            | 2.0          | 0.93                                                                               | 5.4          |
| 300           | 1.00                  | 505                                 | 1.00                                                            | 5.0          | 1.36                                                                  | 2.1          | 0.91                                                            | 2.1          | 0.91                                                                               | 5.4          |
| 310           | 1.00                  | 503                                 | 1.06                                                            | 5.0          | 1.39                                                                  | 1.9          | 0.93                                                            | 1.9          | 0.88                                                                               | 5.4          |
| 320           | 1.00                  | 309                                 | 1.19                                                            | 5.0          | 3.28                                                                  | 2.2          | 1.01                                                            | 2.2          | 0.85                                                                               | 5.5          |
| 320           | 1.01                  | 500                                 | 1.07                                                            | 5.0          | 1.42                                                                  | 1.9          | 0.95                                                            | 1.9          | 0.88                                                                               | 5.4          |
| 330           | 1.00                  | 304                                 | 1.26                                                            | 7.0          | 3.59                                                                  | 2.0          | 1.10                                                            | 2.0          | 0.87                                                                               | 7.3          |
| 340           | 1.00                  | 304                                 | 1.38                                                            | 5.0          | 3.75                                                                  | 2.1          | 1.14                                                            | 2.1          | 0.83                                                                               | 5.4          |
| 350           | 1.00                  | 304                                 | 1.40                                                            | 5.0          | 3.60                                                                  | 2.0          | 1.10                                                            | 2.0          | 0.78                                                                               | 5.4          |
| 360           | 1.00                  | 307                                 | 1.37                                                            | 5.0          | 3.30                                                                  | 2.1          | 1.01                                                            | 2.1          | 0.74                                                                               | 5.4          |
| 360           | 1.00                  | 506                                 | 1.02                                                            | 5.4          | 1.14                                                                  | 2.0          | 0.79                                                            | 2.0          | 0.78                                                                               | 5.8          |
| 370           | 1.00                  | 302                                 | 1.30                                                            | 5.0          | 3.23                                                                  | 2.1          | 0.99                                                            | 2.1          | 0.76                                                                               | 5.4          |
| 377           | 1.01                  | 308                                 | 1.39                                                            | 5.0          | 3.21                                                                  | 2.0          | 0.98                                                            | 2.0          | 0.71                                                                               | 5.4          |
| 380           | 1.00                  | 309                                 | 1.38                                                            | 5.0          | 3.35                                                                  | 2.0          | 1.04                                                            | 2.0          | 0.76                                                                               | 5.4          |
| 390           | 1.01                  | 308                                 | 1.28                                                            | 5.0          | 3.02                                                                  | 2.0          | 0.92                                                            | 2.0          | 0.72                                                                               | 5.4          |
| 390           | 1.01                  | 508                                 | 1.15                                                            | 5.0          | 1.23                                                                  | 1.9          | 0.83                                                            | 1.9          | 0.73                                                                               | 5.4          |
| 400           | 1.00                  | 316                                 | 1.29                                                            | 5.0          | 2.91                                                                  | 2.1          | 0.92                                                            | 2.1          | 0.71                                                                               | 5.4          |
| 405           | 1.01                  | 313                                 | 1.36                                                            | 10.8         | 3.29                                                                  | 2.0          | 1.02                                                            | 2.0          | 0.75                                                                               | 11.0         |
| 410           | 1.01                  | 311                                 | 0.91                                                            | 5.0          | 2.15                                                                  | 2.0          | 0.66                                                            | 2.0          | 0.73                                                                               | 5.4          |
| 420           | 1.00                  | 504                                 | 1.12                                                            | 5.0          | 1.21                                                                  | 2.0          | 0.85                                                            | 2.0          | 0.76                                                                               | 5.4          |
| 430           | 1.00                  | 509                                 | 1.16                                                            | 5.0          | 1.24                                                                  | 1.9          | 0.85                                                            | 1.9          | 0.73                                                                               | 5.4          |
| 440           | 1.01                  | 507                                 | 1.18                                                            | 5.0          | 1.22                                                                  | 2.0          | 0.82                                                            | 2.0          | 0.70                                                                               | 5.4          |
| 447           | 1.01                  | 504                                 | 0.98                                                            | 5.8          | 1.09                                                                  | 2.0          | 0.75                                                            | 2.0          | 0.76                                                                               | 6.1          |
| 450           | 1.00                  | 507                                 | 1.13                                                            | 5.0          | 1.10                                                                  | 2.2          | 0.80                                                            | 2.2          | 0.71                                                                               | 5.5          |
| 460           | 1.01                  | 506                                 | 1.19                                                            | 5.0          | 1.19                                                                  | 2.0          | 0.80                                                            | 2.0          | 0.67                                                                               | 5.4          |

|     |      |     |      |     |      |     |      |     |      |     |
|-----|------|-----|------|-----|------|-----|------|-----|------|-----|
| 468 | 1.01 | 506 | 1.41 | 5.0 | 1.32 | 2.0 | 0.89 | 2.0 | 0.63 | 5.4 |
| 487 | 1.00 | 508 | 1.09 | 5.0 | 1.08 | 2.0 | 0.74 | 2.0 | 0.68 | 5.4 |
| 500 | 1.01 | 505 | 1.34 | 5.0 | 1.35 | 2.0 | 0.91 | 2.0 | 0.68 | 5.4 |
| 514 | 1.00 | 505 | 1.12 | 5.0 | 1.18 | 2.0 | 0.80 | 2.0 | 0.72 | 5.4 |
| 514 | 1.00 | 505 | 1.20 | 5.0 | 1.25 | 2.0 | 0.84 | 2.0 | 0.70 | 5.4 |
| 520 | 1.01 | 506 | 1.56 | 5.0 | 1.53 | 2.0 | 1.03 | 2.0 | 0.66 | 5.4 |
| 533 | 1.00 | 505 | 1.17 | 5.3 | 1.19 | 1.9 | 0.79 | 1.9 | 0.67 | 5.6 |
| 550 | 1.01 | 506 | 1.63 | 5.0 | 1.57 | 2.0 | 1.05 | 2.0 | 0.65 | 5.4 |
| 560 | 1.01 | 505 | 1.32 | 5.0 | 1.45 | 2.0 | 0.97 | 2.0 | 0.74 | 5.4 |
| 580 | 1.01 | 506 | 1.50 | 5.0 | 1.44 | 2.0 | 0.97 | 2.0 | 0.64 | 5.4 |
| 600 | 1.01 | 505 | 1.45 | 5.0 | 1.33 | 1.9 | 0.89 | 1.9 | 0.61 | 5.4 |
| 620 | 1.01 | 506 | 1.45 | 5.0 | 1.33 | 2.0 | 0.89 | 2.0 | 0.61 | 5.4 |
| 630 | 1.00 | 505 | 1.24 | 5.0 | 1.19 | 1.9 | 0.81 | 1.9 | 0.65 | 5.4 |
| 640 | 1.00 | 506 | 1.42 | 5.0 | 1.24 | 2.0 | 0.84 | 2.0 | 0.59 | 5.4 |
| 660 | 1.01 | 506 | 1.44 | 5.0 | 1.28 | 2.0 | 0.86 | 2.0 | 0.60 | 5.4 |
| 670 | 1.01 | 505 | 1.54 | 5.0 | 1.24 | 2.0 | 0.83 | 2.0 | 0.54 | 5.4 |
| 680 | 1.01 | 505 | 1.55 | 5.0 | 1.29 | 2.0 | 0.86 | 2.0 | 0.55 | 5.4 |
| 700 | 1.00 | 504 | 1.49 | 5.0 | 1.18 | 2.0 | 0.80 | 2.0 | 0.53 | 5.4 |
| 790 | 1.00 | 505 | 1.15 | 5.0 | 1.00 | 2.0 | 0.67 | 2.0 | 0.59 | 5.4 |

---

### 3. Updated age-depth model for core PS2458-4

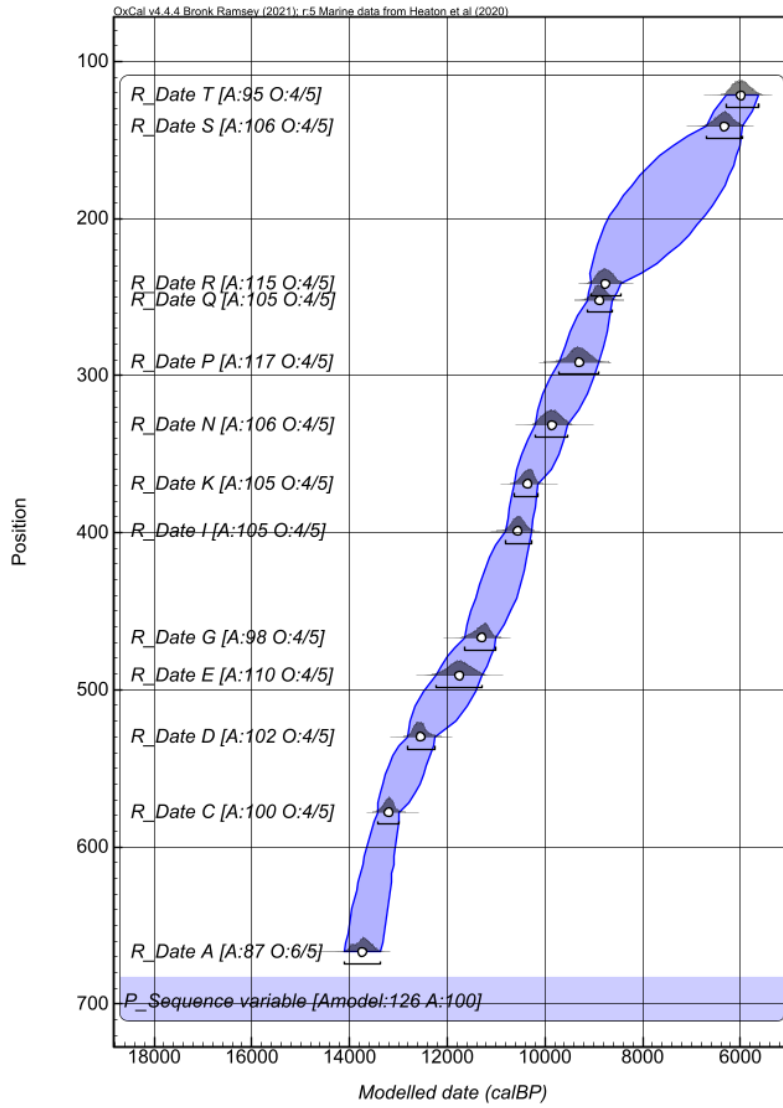

Figure S1. Age-depth model for core PS2458-4 using  $\Delta R$  value of  $345 \pm 60$   $^{14}\text{C}$  years BP

#### 4. Modelled ice core $^{10}\text{Be}$ time series with a tau value of 200 years

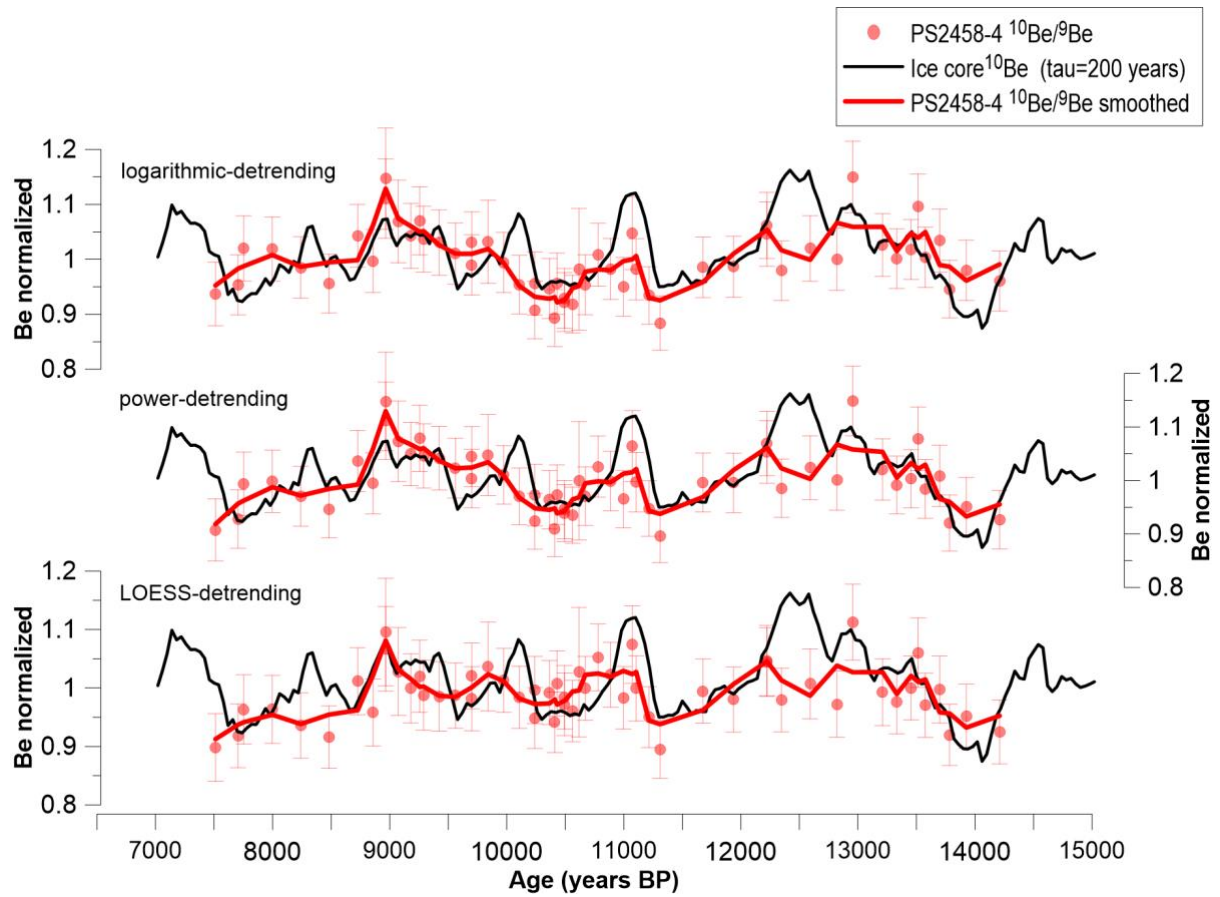

Figure S2. Ice core  $^{10}\text{Be}$  record with tau= 200 years (black) with PS2458-4  $^{10}\text{Be}/^9\text{Be}$  and PS2458-4  $^{10}\text{Be}/^9\text{Be}$  smoothed data (red) plotted based on logarithmic (upper), power (middle) and LOESS (lower) detrending techniques.
