# Supplementary material for: Precise dating of deglacial Laptev Sea sediments via 14 C and authigenic 10 Be/ 9 Be – assessing local 14 C reservoir ages
Source: Copernicus journal article supplement (doi:10.5194/egusphere-2024-1992), 2024-07-04

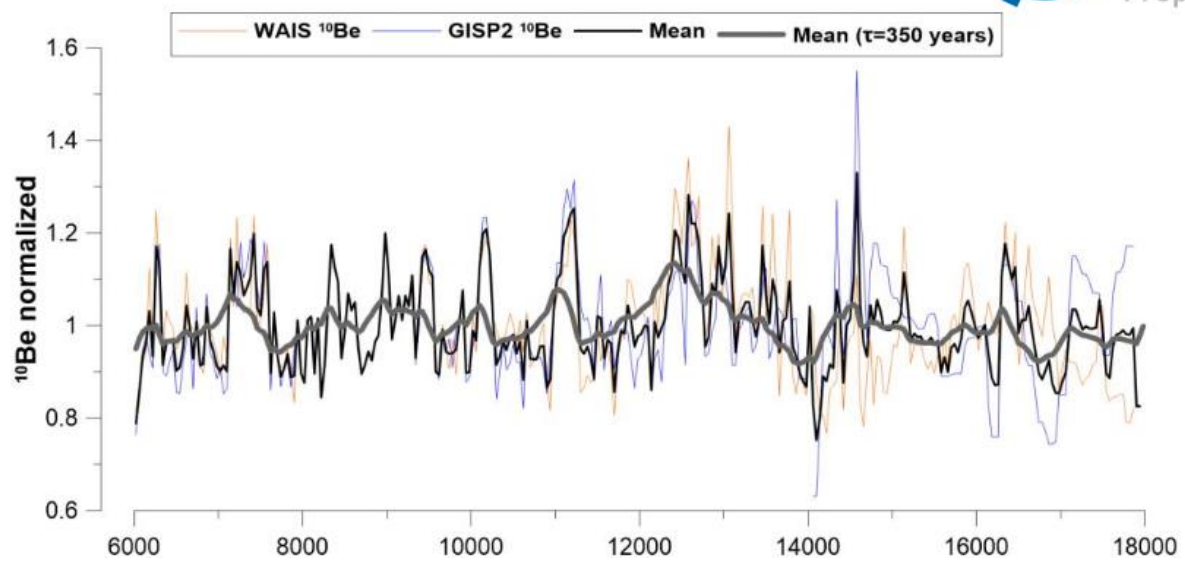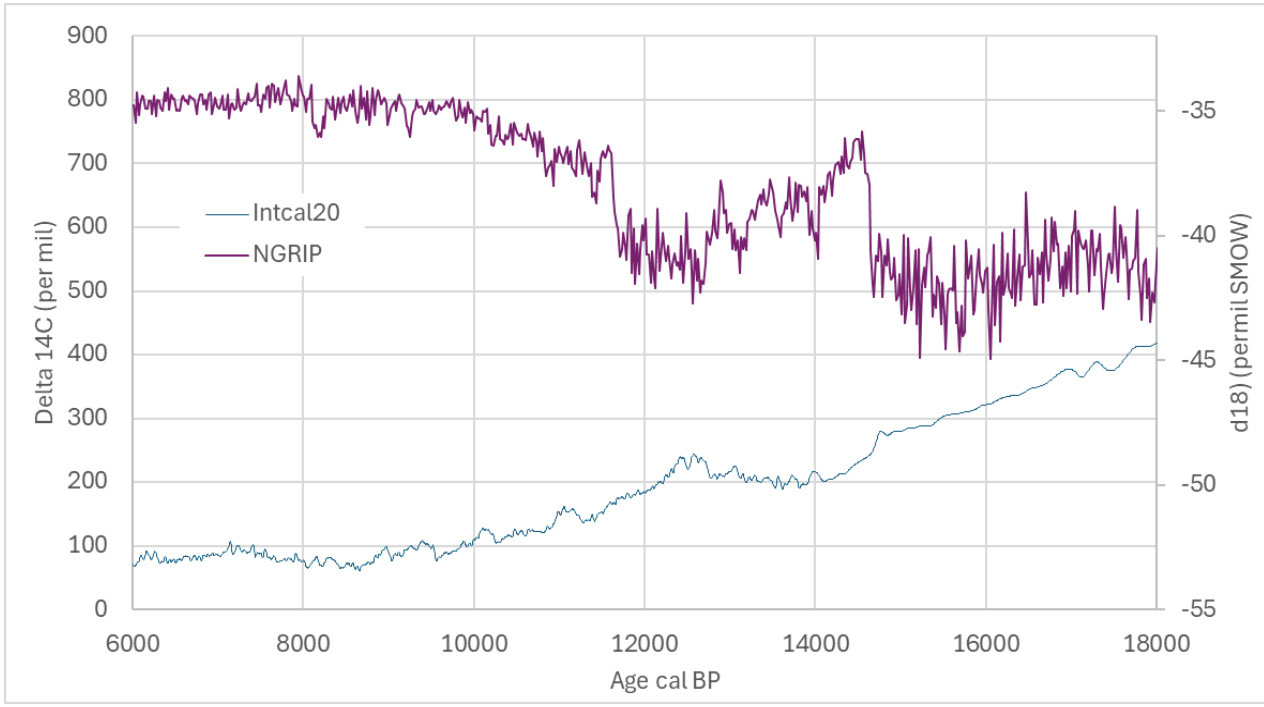

Supplement: Supplementary file [file egusphere-2024-1992-RC1-supplement.pdf]
